# Supplementary material for: Carica papaya L. Leaf: A Systematic Scoping Review on Biological Safety and Herb-Drug Interactions
Source: Hindawi journal article supplement (doi:10.1155/2021/5511221), 2021-05-07
Supplement: f1 [file 5511221.f1.zip]

**S1 Table Details of Ongoing trials (n = 5)**

| No | Title                                                                                            | Country   | Year | Study design                      | Disease | Target Population | Intervention Details                                                       | Route of Administration | Progress                                                   |
|----|--------------------------------------------------------------------------------------------------|-----------|------|-----------------------------------|---------|-------------------|----------------------------------------------------------------------------|-------------------------|------------------------------------------------------------|
| 1  | A clinical trial to study the mechanism of action of papaya leaf extract in dengue patients      | India     | 2014 | Randomised Controlled Trial (RCT) | Dengue  | Adults            | <i>C. papaya</i> leaf extract capsule 1200 mg two times daily for 12 days  | Oral                    | Not yet recruiting, results not published                  |
| 2  | Study on the effects of papaya leaf extract on plasma leakage and platelet count in Dengue fever | Sri Lanka | 2017 | RCT                               | Dengue  | Adults            | <i>C. papaya</i> leaf extract 25 mL two times daily for 5 days             | Oral                    | Study completed, analysis in progress. No publication yet* |
| 4  | Is papaya leaf extract useful in treating Dengue patients?                                       | India     | 2017 | RCT                               | Dengue  | Adults            | <i>C. papaya</i> leaf extract capsule 1100 mg three times daily for 5 days | Oral                    | Recruiting                                                 |
| 5  | Clinical trial for a life saving measure for Dengue patients : <i>Carica papaya</i> leaf extract | India     | 2018 | RCT                               | Dengue  | Adults            | <i>C. papaya</i> leaf extract tablet 1100 mg three times daily for 5 days  | Oral                    | Study completed, analysis in progress. No publication yet* |
| 1  | Effect of <i>Carica papaya</i> leaf extract capsule on platelet counts in Dengue fever           | India     | 2019 | Cluster Randomised Trial          | Dengue  | Adults            | <i>C. papaya</i> leaf extract capsule 1100 mg three times daily for 5 days | Oral                    | Not yet recruiting                                         |

\*Confirmed through private communication with principal investigator
