# Supplementary material for: Carica papaya L. Leaf: A Systematic Scoping Review on Biological Safety and Herb-Drug Interactions
Source: Evid Based Complement Alternat Med. 2021 May 7;2021:5511221. doi: 10.1155/2021/5511221 (PMC8121580; doi:10.1155/2021/5511221)
Supplement: Supplementary Materials — S1 Table. Details of ongoing trials. S1 Appendix. Sample search strategy and keywords. S2 Appendix. Data extraction tables. S3 Appendix. PRISMA-ScR checklist. S4 Appendix. CONSORT checklist for herbal trials, item No. 4. [file 5511221.f1.zip]

Archive with 5 entries (5 files):
- 5511221.f1/S1 Appendix.docx
- 5511221.f1/S1 Table version 1.1.pdf
- 5511221.f1/S2 Appendix.docx
- 5511221.f1/S3 Appendix (1).docx
- 5511221.f1/S4 Appendix version 1.1.pdf
